# Supplementary material for: Harnessing Data Augmentation and Normalization Preprocessing to Improve the Performance of Chemical Reaction Predictions of Data-Driven Model
Source: MDPI journal article supplement (doi:10.3390/polym15092224), 2023-05-08
Supplement: s1 [file s1]

# Harnessing Data Augmentation and Normalization Preprocessing to Improve the Performance of Chemical Reaction Predictions of Data-Driven Model

Boyuan Zhang, Jiaping Lin \*, Lei Du and Liangshun Zhang \*

Shanghai Key Laboratory of Advanced Polymeric Materials, School of Materials Science and Engineering, East China University of Science and Technology, Shanghai 200237, China

\* Correspondence: jlin@ecust.edu.cn (J.L.); zhangls@ecust.edu.cn (L.Z.)

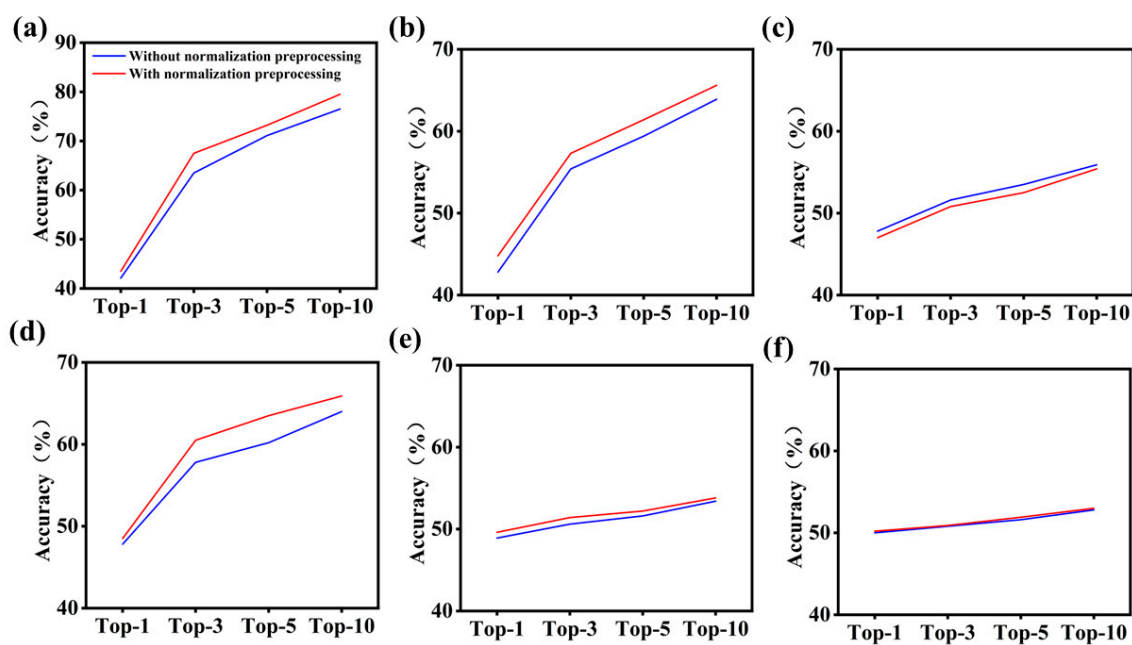

**Figure S1.** The Top-X accuracies of the model before and after normalization preprocessing at (a)1-, (b) 5-, (c) 10-, (d) 15-, (e) 20-, and (f) 40-level data augmentation.
